# Supplementary material for: Effects of Three Different Injection-Molding Methods on the Mechanical Properties and Electrical Conductivity of Carbon Nanotube/Polyethylene/Polyamide 6 Nanocomposite
Source: MDPI journal article supplement (doi:10.3390/polym11111779), 2019-10-30
Supplement: s1 [file s1]

## Supplementary materials

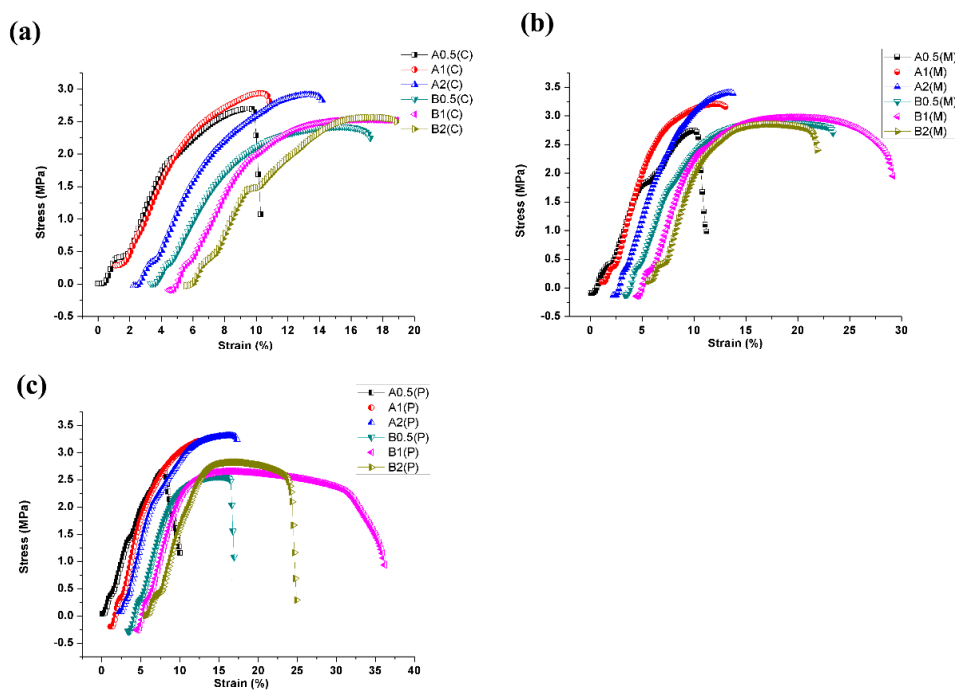

**Figure S1.** Selective stress-strain curves of different samples molded by (a) CIM, (b) MFVIM, and (c) PVIM.
